# Supplementary material
Source: Springer Nature journal article supplement (https://www.springermedizin.de/resource/supplementary/13002_2007_123_MOESM1_ESM.pdf/9627212)

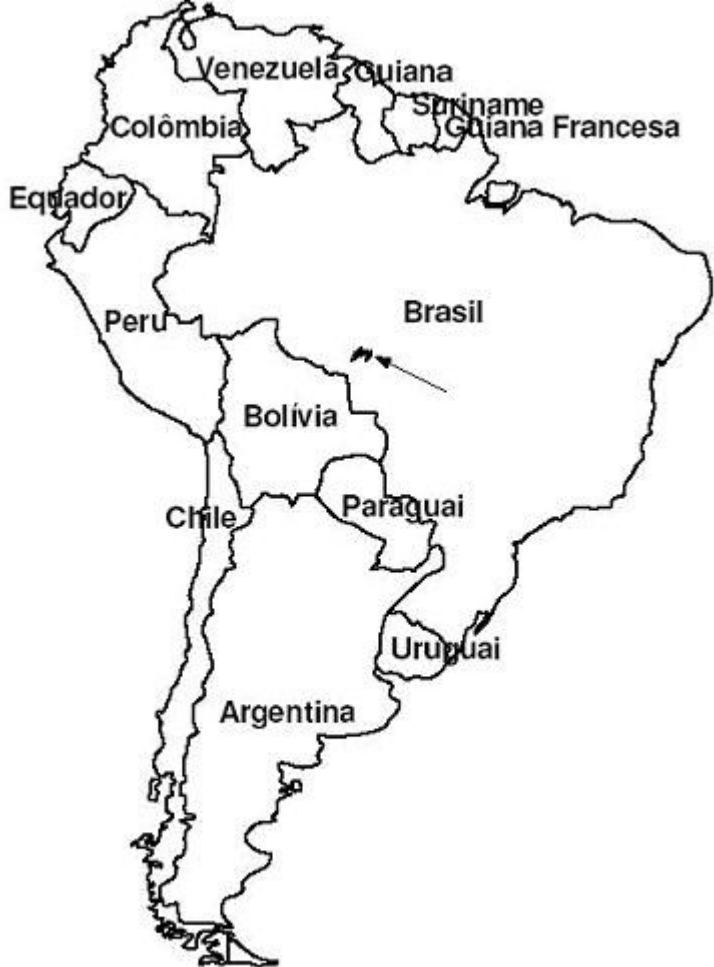

Supplement: MOESM1 [file 9627212]
